# Supplementary material for: Nursing attitudes towards continuous capnographic monitoring of floor patients
Source: PubMed Central journal article supplement (PMC6144903; doi:10.1136/bmjoq-2018-000416), 2018-09-15
Supplement: bmjoq-2018-000416supp001.pdf [file bmjoq-2018-000416supp001.pdf]

# Nurse Capnography Survey

Record ID \_\_\_\_\_

|                                                                                                         | Very Negatively       | Somewhat Negatively   | Not at all            | Somewhat Positively   | Very Positively       |
|---------------------------------------------------------------------------------------------------------|-----------------------|-----------------------|-----------------------|-----------------------|-----------------------|
| How is your ability to carry out your duties affected by adding capnography monitoring to patient care? | <input type="radio"/> | <input type="radio"/> | <input type="radio"/> | <input type="radio"/> | <input type="radio"/> |

|                                                                             | Very Negatively       | Somewhat Negatively   | Not at All            | Somewhat Positively   | Very Positively       |
|-----------------------------------------------------------------------------|-----------------------|-----------------------|-----------------------|-----------------------|-----------------------|
| How do you feel patient safety is being affected by capnography monitoring? | <input type="radio"/> | <input type="radio"/> | <input type="radio"/> | <input type="radio"/> | <input type="radio"/> |

|                                                                                                                               | None                  | A Few                 | Many                  |
|-------------------------------------------------------------------------------------------------------------------------------|-----------------------|-----------------------|-----------------------|
| How many experiences have you had with patients who had escalations of care that might have been prevented using capnography? | <input type="radio"/> | <input type="radio"/> | <input type="radio"/> |

|                                                                              | Very Negative         | Somewhat Negative     | Not at All            | Somewhat Positive     | Very Positive         |
|------------------------------------------------------------------------------|-----------------------|-----------------------|-----------------------|-----------------------|-----------------------|
| What effect do you think capnography monitoring has on patient satisfaction? | <input type="radio"/> | <input type="radio"/> | <input type="radio"/> | <input type="radio"/> | <input type="radio"/> |

|                                                                                                       | Very Low              | Somewhat Low          | Neither High nor Low  | Somewhat High         | Very High             |
|-------------------------------------------------------------------------------------------------------|-----------------------|-----------------------|-----------------------|-----------------------|-----------------------|
| What level of cooperation would you describe patients as having with wearing the capnography cannula? | <input type="radio"/> | <input type="radio"/> | <input type="radio"/> | <input type="radio"/> | <input type="radio"/> |

|                                                                                                                       | Pulse oximetry more necessary | Equal                 | Capnography more necessary |
|-----------------------------------------------------------------------------------------------------------------------|-------------------------------|-----------------------|----------------------------|
| Which choice best describes your attitude towards the necessity of pulse oximetry monitoring compared to capnography? | <input type="radio"/>         | <input type="radio"/> | <input type="radio"/>      |

|  | Very Indirect         | Somewhat Indirect     | Open to Feedback      | Somewhat Direct       | Very Direct           |
|--|-----------------------|-----------------------|-----------------------|-----------------------|-----------------------|
|  | <input type="radio"/> | <input type="radio"/> | <input type="radio"/> | <input type="radio"/> | <input type="radio"/> |

Please describe your style of patient communication: direct (telling patients protocols they will follow) or indirect (suggestion that they follow certain protocols)?

                                                                                      

|                                                                                    | At Extreme Risk       | Somewhat more at Risk | Not Changed           | Somewhat Improved     | Greatly Improved      |
|------------------------------------------------------------------------------------|-----------------------|-----------------------|-----------------------|-----------------------|-----------------------|
| If capnography monitoring were removed today, do you think patient safety would be | <input type="radio"/> | <input type="radio"/> | <input type="radio"/> | <input type="radio"/> | <input type="radio"/> |

**Please indicated the degree to which you agree with following statements:**

|                                                                                  | Strongly Disagree     | Somewhat Disagree     | Neither Agree nor Disagree | Somewhat Agree        | Strongly Agree        |
|----------------------------------------------------------------------------------|-----------------------|-----------------------|----------------------------|-----------------------|-----------------------|
| Capnography provides important feedback DURING surgery                           | <input type="radio"/> | <input type="radio"/> | <input type="radio"/>      | <input type="radio"/> | <input type="radio"/> |
| Capnography provides important feedback up to 1 hour post-surgery                | <input type="radio"/> | <input type="radio"/> | <input type="radio"/>      | <input type="radio"/> | <input type="radio"/> |
| Capnography provides important feedback up to 8 hours post-surgery               | <input type="radio"/> | <input type="radio"/> | <input type="radio"/>      | <input type="radio"/> | <input type="radio"/> |
| Capnography provides important feedback up to 24 hours post-surgery              | <input type="radio"/> | <input type="radio"/> | <input type="radio"/>      | <input type="radio"/> | <input type="radio"/> |
| Capnography provides important feedback in the presence of certain comorbidities | <input type="radio"/> | <input type="radio"/> | <input type="radio"/>      | <input type="radio"/> | <input type="radio"/> |
| Capnography provides important clinical data in the unstable patient             | <input type="radio"/> | <input type="radio"/> | <input type="radio"/>      | <input type="radio"/> | <input type="radio"/> |

|                                                                                             | Not at all urgent     | Somewhat urgent       | Extremely urgent      |
|---------------------------------------------------------------------------------------------|-----------------------|-----------------------|-----------------------|
| What level of urgency do you currently assign to an alarm for apnea?                        | <input type="radio"/> | <input type="radio"/> | <input type="radio"/> |
| What level of urgency do you currently assign to an alarm for a respiratory rate violation? | <input type="radio"/> | <input type="radio"/> | <input type="radio"/> |
| What level of urgency do you currently assign to an alarm for a heart rate violation?       | <input type="radio"/> | <input type="radio"/> | <input type="radio"/> |
| What level of urgency do you currently assign to an alarm for an SpO2 violation?            | <input type="radio"/> | <input type="radio"/> | <input type="radio"/> |

Additional Comments
